# Supplementary material for: Predicting Possible Distribution of Tea (Camellia sinensis L.) under Climate Change Scenarios Using MaxEnt Model in China
Source: MDPI journal article supplement (doi:10.3390/agriculture11111122), 2021-11-10
Supplement: s1 [file s1]

### Supplementary Materials:

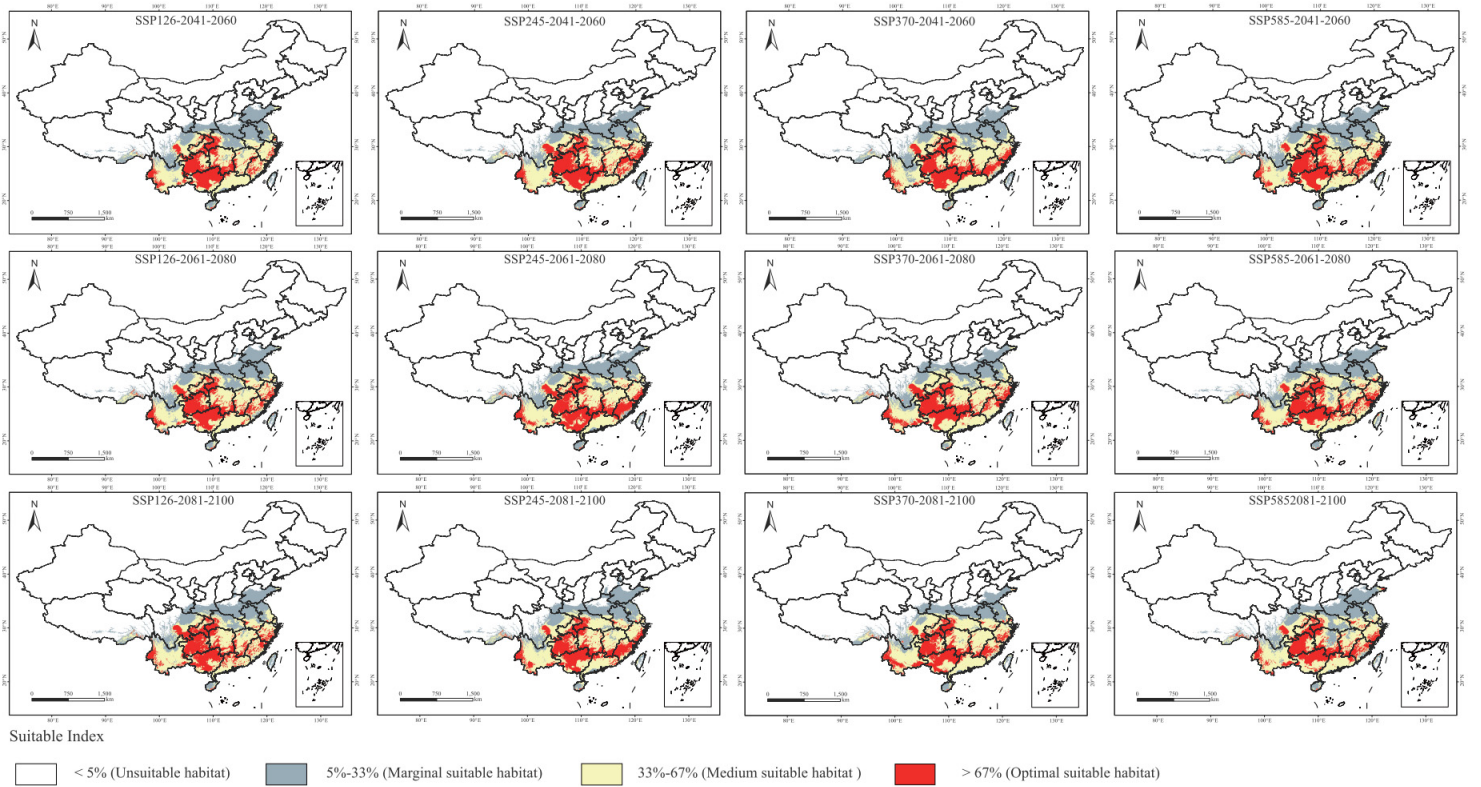

**Figure S1:** The potential distribution area of Tea based on the future bioclimatic variables at 2050s (2041-2060), 2070s (2061-2080), and 2090s (2081-2100)

**Table S1:** Distribution areas ( $10^4 \times \text{km}^2$ ) under different suitability classes of Tea under current and future climate conditions, 2050s: 2041-2060, 2070s: 2061-2080, 2090s: 2081-2100

| Climate Scenarios | Year            | Areas under different suitability classes ( $10^4 \times \text{km}^2$ ) |               |                 |               |
|-------------------|-----------------|-------------------------------------------------------------------------|---------------|-----------------|---------------|
|                   |                 | (Percentage is shown in brackets)                                       |               |                 |               |
|                   |                 | Unsuitable                                                              | Marginal      | Medium          | Optimal       |
| SSP126            | Current Climate | 698.72 (72.49%)                                                         | 82.01 (8.51%) | 115.97 (12.03%) | 67.14 (6.97%) |
|                   | 2050s           | 697.75 (72.39%)                                                         | 89.92 (9.33%) | 117.94 (12.24%) | 58.24 (6.04%) |
|                   | 2070s           | 695.88 (72.20%)                                                         | 87.37 (9.06%) | 118.45 (12.29%) | 62.16 (6.45%) |
|                   | 2090s           | 697.21 (72.34%)                                                         | 83.29 (8.64%) | 116.17 (12.05%) | 67.18 (6.97%) |
| SSP245            | 2050s           | 700.07 (72.63%)                                                         | 81.14 (8.42%) | 113.41 (11.77%) | 69.23 (7.18%) |
|                   | 2070s           | 699.10 (72.53%)                                                         | 80.54 (8.36%) | 116.67 (12.1%)  | 67.54 (7.01%) |
|                   | 2090s           | 693.53 (71.95%)                                                         | 81.69 (8.47%) | 124.87 (12.96%) | 63.76 (6.62%) |
| SSP370            | 2050s           | 698.35 (72.45%)                                                         | 85.80 (8.9%)  | 116.82 (12.12%) | 62.88 (6.52%) |
|                   | 2070s           | 699.08 (72.53%)                                                         | 78.07 (8.10%) | 121.47 (12.60%) | 65.22 (6.77%) |
|                   | 2090s           | 702.01 (72.83%)                                                         | 71.64 (7.43%) | 128.92 (13.38%) | 61.28 (6.36%) |
| SSP585            | 2050s           | 696.21 (72.23%)                                                         | 88.04 (9.13%) | 114.74 (11.9%)  | 64.85 (6.73%) |
|                   | 2070s           | 694.77 (72.08%)                                                         | 82.38 (8.55%) | 120.94 (12.55%) | 65.76 (6.82%) |
|                   | 2090s           | 695.00 (72.11%)                                                         | 88.48 (9.18%) | 118.98 (12.34%) | 61.39 (6.37%) |

**Table S2:** The Spatial coverage area ( $10^4 \times \text{km}^2$ ) of habitat suitability category code at future scenarios. “0” indicates Unsuitable habitat, “1” indicates Marginal suitable habitat, “2” indicates Medium suitable habitat, “3” indicates Optimal suitable habitat; 2050s: 2041-2060, 2070s: 2061-2080, 2090s: 2081-2100

| Climate<br>Scenarios | Year  | Area changes of category code ( $10^4 \times \text{km}^2$ ) |        |        |        |        |        |        |        |        |
|----------------------|-------|-------------------------------------------------------------|--------|--------|--------|--------|--------|--------|--------|--------|
|                      |       | 0 to 1                                                      | 0 to 2 | 1 to 2 | 1 to 3 | 2 to 3 | 1 to 0 | 2 to 1 | 3 to 1 | 3 to 2 |
| SSP126               | 2050s | 3.52                                                        | 0      | 2.49   | 0      | 7.29   | 2.55   | 9.4    | 0.0278 | 16.17  |
|                      | 2070s | 4.88                                                        | 0      | 5.95   | 0.0052 | 9.15   | 2.03   | 8.45   | 0.0157 | 14.12  |
|                      | 2090s | 3.95                                                        | 0      | 7.4    | 0.0157 | 12.91  | 2.44   | 7.19   | 0.007  | 12.88  |
| SSP245               | 2050s | 2.57                                                        | 0      | 7.68   | 0      | 8.76   | 3.92   | 8.11   | 0.0522 | 8.36   |
|                      | 2070s | 5.46                                                        | 0      | 8.47   | 0      | 13.99  | 5.8    | 7.32   | 0.0348 | 13.53  |
|                      | 2090s | 8                                                           | 0      | 11.57  | 0.0139 | 11.2   | 2.8    | 6.06   | 0.0087 | 14.58  |
| SSP370               | 2050s | 3.35                                                        | 0      | 4.55   | 0.0035 | 10.17  | 2.98   | 7.96   | 0      | 14.44  |
|                      | 2070s | 3.59                                                        | 0      | 9.51   | 0.0122 | 15.14  | 3.95   | 5.9    | 0.0452 | 17.02  |
|                      | 2090s | 2.94                                                        | 0.0591 | 13.4   | 0.1026 | 13.3   | 6.32   | 6.49   | 0.0261 | 19.26  |
| SSP585               | 2050s | 6.19                                                        | 0      | 11.49  | 0.0487 | 13.87  | 2.26   | 7.97   | 0.0017 | 15.31  |
|                      | 2070s | 5.23                                                        | 0      | 4.97   | 0.0035 | 10.1   | 2.72   | 8.49   | 0      | 12.4   |
|                      | 2090s | 6.38                                                        | 0      | 9.74   | 0.0087 | 11.48  | 2.67   | 12.48  | 0.0122 | 17.23  |
